# Supplementary material for: Photoperiodic regime influences onset of lens opacities in a non-human primate
Source: PeerJ. 2017 May 4;5:e3258. doi: 10.7717/peerj.3258 (PMC5420196; doi:10.7717/peerj.3258)
Supplement: Supplemental Information 1 — The tables show all animals from colony 1 and 2 which showed opacities in following examinations but had no visible opacities in the previous investigations. These are all animals which have been used for statistical analysis. [file peerj-05-3258-s001.xlsx]

## Sheet: Colony 1
Name	Date	Time of investigation	Investigator	Assistent	Species	Sex	Date of birth	age	Room-number	Activity	IOP/mmHg	IOP/mmHG	Pupillary reflex/right	Pupillary reflex/left	Corneal anomalies/right	Signs for Uveitis/right	fronter eye chamber - others/right	Corneal anomalies/left	Signs for Uveitis/left	fronter eye chamber - others/left	Cataract/right	localisation/right - anterior/posterior	localisation/right -nuclear/cortical/epithelial	expansion/right	nuclear sclerosis/right	Lens others/right	Cataract/left	localisation/left - anterior/posterior	localisation/left -nuclear/cortical/epithelial	expansion/left	nuclear sclerosis/left	Lens others/left	Fundus findings/right	Area centralis involved/right	retinal atrophy/right	optic disc involved/right	Fundus others/right	Fundus findings/left	Area centralis involved/left	retinal atrophy/left	optic disc involved/left	Fundus others/left
Quilla	2013-03-05	14:00:00	Marko	Kathrin	M.murinus	W	2009-06-15	3.72329	3	14:00:00	11	11	<2sec	<2sec	no	no	no	no	no	no	no	no	no	no	yes	no	no	no	no	no	yes	no	no	no	no	no	no	yes	no	no	no	Pigmentation
Tipi	2013-03-06	14:55:00	Marko	Kathrin	M.murinus	W	2006-06-18	6.72055	3	14:00:00	9	12	<2sec	<2sec	no	no	no	no	no	no	no	no	no	no	yes	no	no	no	no	no	yes	no	no	no	no	no	no	no	no	no	no	no
Urania	2013-03-07	10:55:00	Marko	Philipp	M.murinus	W	2005-05-03	7.84932	2	10:00:00	7	8	<2sec	<2sec	no	no	no	no	no	no	no	no	no	no	yes	no	no	no	no	no	yes	no	no	no	no	no	no	no	no	no	no	no
Strolch	2013-03-08	10:25:00	Marko	Corinna	M.murinus	M	2007-05-03	5.85205	2	10:00:00	9	9	<2sec	<2sec	no	no	no	no	no	no	no	no	no	no	yes	no	no	no	no	no	yes	no	yes	no	no	no	Pigmentation	yes	no	no	no	Pigmentation
Peanut	2013-03-13	14:10:00	Marko	Annette	M.murinus	M	2010-04-28	2.87671	3	14:00:00	9	8	<2sec	<2sec	no	no	no	no	no	no	no	no	no	no	yes	no	no	no	no	no	yes	no	no	no	no	no	no	no	no	no	no	no
Pixie	2013-03-20	13:20:00	Marko	Jenny	M.murinus	W	2010-04-21	2.91507	4	12:00:00	9	10	<2sec	<2sec	no	no	no	no	no	no	no	no	no	no	yes	no	no	no	no	no	yes	no	no	no	no	no	no	yes	no	no	no	Pigmentation
Quelle	2013-03-20	13:10:00	Marko	Jenny	M.murinus	W	2009-06-15	3.76438	4	12:00:00	8	8	<2sec	<2sec	no	no	no	no	no	no	no	no	no	no	yes	no	no	no	no	no	yes	no	no	no	no	no	no	no	no	no	no	no
Romy	2013-03-20	13:45:00	Marko	Jenny	M.murinus	W	2008-04-12	4.93973	4	12:00:00	10	12	<2sec	<2sec	no	no	no	no	no	no	no	no	no	no	yes	no	no	no	no	no	yes	no	yes	no	no	no	Pigmentation	no	no	no	no	no
Rosa	2013-03-20	13:35:00	Marko	Jenny	M.murinus	W	2008-04-12	4.93973	4	12:00:00	7	8	<2sec	<2sec	no	no	no	no	no	no	no	no	no	no	yes	no	no	no	no	no	yes	no	yes	no	no	no	Pigmentation	yes	no	no	no	Pigmentation
Quark	2013-03-21	10:25:00	Marko	Annette	M.murinus	M	2009-05-13	3.85753	7	12:00:00	10	10	<2sec	<2sec	no	no	no	no	no	no	no	no	no	no	yes	no	no	no	no	no	yes	no	no	no	no	no	no	no	no	no	no	no
Quinn	2013-03-21	11:00:00	Marko	Sandra	M.murinus	M	2009-06-15	3.76712	7	12:00:00	10	9	<2sec	<2sec	no	no	no	no	no	no	no	no	no	no	yes	no	no	no	no	no	yes	no	no	no	no	no	no	no	no	no	no	no
Quitte	2013-03-21	10:05:00	Marko	Annette	M.murinus	W	2009-06-15	3.76712	7	12:00:00	11	12	<2sec	<2sec	no	no	no	no	no	no	no	no	no	no	yes	no	no	no	no	no	yes	no	yes	no	no	no	Pigmentation	yes	no	no	no	Pigmentation
Prinz	2013-03-22	10:40:00	Marko	Annette	M.murinus	M	2010-06-02	2.80548	4	10:00:00	11	11	<2sec	<2sec	no	no	no	no	no	no	no	no	no	no	yes	no	no	no	no	no	yes	no	no	no	no	no	no	no	no	no	no	no
Susi	2013-03-22	10:30:00	Marko	Annette	M.murinus	W	2007-05-03	5.89041	4	12:00:00	12	10	<2sec	<2sec	no	no	no	no	no	no	no	no	no	no	yes	no	no	no	no	no	yes	no	no	no	no	no	no	no	no	no	no	no
Queenie	2013-03-31	10:00:00	Marko	Annette	M.murinus	W	2009-05-13	3.88493	2	10:00:00	11	11	<2sec	<2sec	no	no	no	no	no	no	no	no	no	no	yes	no	no	no	no	no	yes	no	yes	no	no	no	Pigmentation	no	no	no	no	no
Nuria	2014-03-12	14:10:00	Marko	Annette	M.murinus	W	2012-05-25	1.79726	3	14:00:00	7	9	<2sec	<2sec	no	no	no	no	no	no	no	no	no	no	yes	no	no	no	no	no	yes	no	no	no	no	no	no	no	no	no	no	no
Opal	2014-03-12	15:40:00	Marko	Annette	M.murinus	M	2011-06-09	2.7589	3	14:00:00	8	8	<2sec	<2sec	no	no	no	no	no	no	no	no	no	no	yes	no	no	no	no	no	yes	no	no	no	no	no	no	yes	no	no	no	Pigmentation
Pam	2014-03-06	15:05:00	Marko	Annette	M.murinus	W	2010-05-23	3.78904	3	14:00:00	12	11	<2sec	<2sec	no	no	no	no	no	no	no	no	no	no	yes	no	no	no	no	no	yes	no	no	no	no	no	no	no	no	no	no	no
Paula	2014-03-07	10:25:00	Marko	Annette	M.murinus	W	2010-04-17	3.89041	2	10:00:00	11	10	<2sec	<2sec	no	no	no	no	no	no	no	no	no	no	yes	no	no	no	no	no	yes	no	no	no	no	no	no	no	no	no	no	no
Pegasus	2014-03-07	10:25:00	Marko	Annette	M.murinus	M	2010-04-21	3.87945	2	10:00:00	10	10	<2sec	<2sec	no	no	no	no	no	no	no	no	no	no	yes	no	no	no	no	no	yes	no	yes	no	no	no	Pigmentation	yes	no	no	no	Pigmentation
Pepe	2014-03-20	13:35:00	Marko	Annette	M.murinus	M	2010-04-16	3.92877	4	12:00:00	11	12	<2sec	<2sec	no	no	no	no	no	no	no	no	no	no	yes	no	no	no	no	no	yes	no	yes	no	no	no	Pigmentation	yes	no	no	no	Pigmentation
Petra	2014-03-21	11:30:00	Marko	Annette	M.murinus	W	2010-05-29	3.8137	7	12:00:00	11	13	<2sec	<2sec	no	no	no	no	no	no	no	no	no	no	yes	no	no	no	no	no	yes	no	no	no	no	no	no	no	no	no	no	no
Phil	2014-03-12	15:00:00	Marko	Annette	M.murinus	M	2010-06-12	3.75068	3	14:00:00	8	9	<2sec	<2sec	no	no	no	no	no	no	no	no	no	no	yes	no	no	no	no	no	yes	no	no	no	no	no	no	no	no	no	no	no
Poppy	2014-03-20	11:30:00	Marko	Annette	M.murinus	W	2010-05-29	3.81096	4	12:00:00	9	8	<2sec	<2sec	no	no	no	no	no	no	no	no	no	no	yes	no	no	no	no	no	yes	no	no	no	no	no	no	no	no	no	no	no
Puma	2014-03-20	11:10:00	Marko	Annette	M.murinus	M	2010-04-21	3.91507	4	12:00:00	13	11	<2sec	<2sec	no	no	no	no	no	no	no	no	no	no	yes	no	no	no	no	no	yes	no	yes	no	no	no	Pigmentation	yes	no	no	no	Pigmentation
Saphira	2014-03-06	15:10:00	Marko	Annette	M.murinus	W	2007-06-24	6.70411	3	14:00:00	10	7	<2sec	<2sec	no	no	no	no	no	no	no	no	no	no	yes	no	no	no	no	no	yes	no	no	no	no	no	no	no	no	no	no	no
Tiger	2014-03-07	10:40:00	Marko	Annette	M.murinus	M	2006-04-19	7.88767	2	10:00:00	10	11	<2sec	<2sec	no	no	no	no	no	no	no	no	no	no	yes	no	no	no	no	no	yes	no	no	no	no	no	no	no	no	no	no	no

## Sheet: Colony 2
Name	Date	Time of investigation	Investigator	Assistent	Species	Sex	Date of birth	age	Room-number	Activity	IOP/mmHg	IOP/mmHG	Pupillary reflex/right	Pupillary reflex/left	Corneal anomalies/right	Signs for Uveitis/right	fronter eye chamber - others/right	Corneal anomalies/left	Signs for Uveitis/left	fronter eye chamber - others/left	Cataract/right	localisation/right - anterior/posterior	localisation/right -nuclear/cortical/epithelial	expansion/right	nuclear sclerosis/right	Lens others/right	Cataract/left	localisation/left - anterior/posterior	localisation/left -nuclear/cortical/epithelial	expansion/left	nuclear sclerosis/left	Lens others/left	Fundus findings/right	Area centralis involved/right	retinal atrophy/right	optic disc involved/right	Fundus others/right	Fundus findings/left	Area centralis involved/left	retinal atrophy/left	optic disc involved/left	Fundus others/left
673	2013-05-07	10:10:00	Marko	Marine	M.murinus	W	2008-01-02	5.34795	16	12:00:00	10	9	<2sec	<2sec	no	no	no	no	no	no	no	no	no	no	yes	no	no	no	no	no	yes	no	no	no	no	no	no	no	no	no	no	no
747	2013-04-24	09:55:00	Marko	Marine	M.murinus	M	2009-01-23	4.25205	34	12:00:00	9	8	<2sec	<2sec	no	no	no	no	no	no	no	no	no	no	yes	no	no	no	no	no	yes	no	no	no	no	no	no	no	no	no	no	no
750	2013-04-18	09:45:00	Marko	Marine	M.murinus	M	2009-03-18	4.08767	28	12:00:00	11	11	<2sec	<2sec	no	no	no	no	no	no	no	no	no	no	yes	no	no	no	no	no	yes	no	no	no	no	no	no	no	no	no	no	no
752	2013-04-22	09:55:00	Marko	Marine	M.murinus	M	2009-03-18	4.09863	31	12:00:00	11	11	<2sec	<2sec	no	no	no	no	no	no	no	no	no	no	yes	no	no	no	no	no	yes	no	no	no	no	no	no	no	no	no	no	no
754	2013-05-07	09:40:00	Marko	Marine	M.murinus	W	2009-03-18	4.13973	16	12:00:00	/	/	<2sec	<2sec	no	no	no	no	no	no	no	no	no	no	yes	no	no	no	no	no	yes	no	no	no	no	no	no	no	no	no	no	no
788	2013-04-19	10:40:00	Marko	Marine	M.murinus	W	2009-11-09	3.44384	30	12:00:00	12	9	<2sec	<2sec	no	no	no	no	no	no	no	no	no	no	yes	no	no	no	no	no	yes	no	no	no	no	no	no	no	no	no	no	no
789	2013-05-07	12:10:00	Marko	Marine	M.murinus	W	2009-11-09	3.49315	15	12:00:00	10	9	<2sec	<2sec	no	no	no	no	no	no	no	no	no	no	yes	no	no	no	no	no	yes	no	no	no	no	no	no	no	no	no	no	no
792	2013-04-22	10:25:00	Marko	Marine	M.murinus	M	2009-11-09	3.45205	31	12:00:00	10	10	<2sec	<2sec	no	no	no	no	no	no	no	no	no	no	yes	no	no	no	no	no	yes	no	no	no	no	no	no	no	no	no	no	no
793	2013-04-22	10:05:00	Marko	Marine	M.murinus	M	2009-11-09	3.45205	31	12:00:00	10	11	<2sec	<2sec	no	no	no	no	no	no	no	no	no	no	yes	no	no	no	no	no	yes	no	no	no	no	no	no	no	no	no	no	no
794	2013-05-07	12:05:00	Marko	Marine	M.murinus	W	2009-11-09	3.49315	15	12:00:00	8	8	<2sec	<2sec	no	no	no	no	no	no	no	no	no	no	yes	no	no	no	no	no	yes	no	no	no	no	no	no	no	no	no	no	no
796	2013-05-06	10:45:00	Marko	Marine	M.murinus	M	2010-01-25	3.27945	P2	12:00:00	10	7	<2sec	<2sec	no	no	no	no	no	no	no	no	no	no	yes	no	no	no	no	no	yes	no	no	no	no	no	no	no	no	no	no	no
828	2013-05-02	11:40:00	Marko	Marine	M.murinus	W	2010-05-21	2.95068	40	12:00:00	10	9	<2sec	<2sec	no	no	no	no	no	no	no	no	no	no	yes	no	no	no	no	no	yes	no	no	no	no	no	no	no	no	no	no	no
830	2013-05-06	10:10:00	Marko	Marine	M.murinus	M	2010-07-13	2.81644	P2	12:00:00	9	8	<2sec	<2sec	no	no	no	no	no	no	no	no	no	no	yes	no	no	no	no	no	yes	no	no	no	no	no	no	no	no	no	no	no
840	2013-05-03	10:15:00	Marko	Marine	M.murinus	W	2010-07-12	2.81096	16	12:00:00	9	9	<2sec	<2sec	no	no	no	no	no	no	no	no	no	no	yes	no	no	no	no	no	yes	no	no	no	no	no	no	no	no	no	no	no
859	2013-05-07	10:40:00	Marko	Marine	M.murinus	M	2010-07-08	2.83288	16	12:00:00	/	/	<2sec	<2sec	no	no	no	no	no	no	no	no	no	no	yes	no	no	no	no	no	yes	no	no	no	no	no	no	no	no	no	no	no
870	2013-04-16	13:00:00	Marko	Marine	M.murinus	M	2011-02-14	2.16986	8	12:00:00	13	10	<2sec	<2sec	no	no	no	no	no	no	no	no	no	no	yes	no	no	no	no	no	yes	no	no	no	no	no	no	no	no	no	no	no
876	2013-04-16	13:25:00	Marko	Marine	M.murinus	M	2011-02-16	2.16438	8	12:00:00	8	8	<2sec	<2sec	no	no	no	no	no	no	no	no	no	no	yes	no	no	no	no	no	yes	no	no	no	no	no	no	no	no	no	no	no
880	2013-05-02	11:50:00	Marko	Marine	M.murinus	W	2011-03-14	2.13699	40	12:00:00	12	12	<2sec	<2sec	no	no	no	no	no	no	no	no	no	no	yes	no	no	no	no	no	yes	no	no	no	no	no	no	no	no	no	no	no
886	2013-04-29	11:15:00	Marko	Marine	M.murinus	M	2011-03-14	2.12877	15	12:00:00	7	8	<2sec	<2sec	no	no	no	no	no	no	no	no	no	no	yes	no	no	no	no	no	yes	no	no	no	no	no	no	no	no	no	no	no
887	2013-04-18	10:50:00	Marko	Marine	M.murinus	W	2011-03-14	2.09863	28	12:00:00	8	9	<2sec	<2sec	no	no	no	no	no	no	no	no	no	no	yes	no	no	no	no	no	yes	no	no	no	no	no	no	no	no	no	no	no
891	2013-05-06	10:25:00	Marko	Marine	M.murinus	M	2011-03-14	2.14795	P2	12:00:00	10	11	<2sec	<2sec	no	no	no	no	no	no	no	no	no	no	yes	no	no	no	no	no	yes	no	no	no	no	no	no	no	no	no	no	no
917	2013-04-23	11:20:00	Marko	Marine	M.murinus	W	2011-03-18	2.10137	33	12:00:00	7	7	<2sec	<2sec	no	no	no	no	no	no	no	no	no	no	yes	no	no	no	no	no	yes	no	no	no	no	no	no	no	no	no	no	no
918	2013-04-18	11:45:00	Marko	Marine	M.murinus	M	2011-03-18	2.08767	28	12:00:00	10	11	<2sec	<2sec	no	no	no	no	no	no	no	no	no	no	yes	no	no	no	no	no	yes	no	no	no	no	no	no	no	no	no	no	no
935	2013-04-23	11:40:00	Marko	Marine	M.murinus	W	2011-04-27	1.99178	33	12:00:00	13	11	<2sec	<2sec	no	no	no	no	no	no	no	no	no	no	yes	no	no	no	no	no	yes	no	no	no	no	no	no	no	no	no	no	no
938	2013-04-18	10:10:00	Marko	Marine	M.murinus	M	2011-05-02	1.96438	28	12:00:00	14	13	<2sec	<2sec	no	no	no	no	no	no	no	no	no	no	yes	no	no	no	no	no	yes	no	no	no	no	no	no	no	no	no	no	no
942	2013-05-02	11:30:00	Marko	Marine	M.murinus	W	2011-10-25	1.52055	40	12:00:00	8	9	<2sec	<2sec	no	no	no	no	no	no	no	no	no	no	yes	no	no	no	no	no	yes	no	no	no	no	no	no	no	no	no	no	no
946	2013-04-24	10:35:00	Marko	Marine	M.murinus	M	2011-09-29	1.56986	34	12:00:00	10	11	<2sec	<2sec	no	no	no	no	no	no	no	no	no	no	yes	no	no	no	no	no	yes	no	no	no	no	no	no	no	no	no	no	no
947	2013-05-02	10:30:00	Marko	Marine	M.murinus	M	2011-09-29	1.59178	40	12:00:00	8	9	<2sec	<2sec	no	no	no	no	no	no	no	no	no	no	yes	no	no	no	no	no	yes	no	no	no	no	no	no	no	no	no	no	no
948	2013-04-17	14:10:00	Marko	Marine	M.murinus	W	2011-10-25	1.47945	10	12:00:00	8	7	<2sec	<2sec	no	no	no	no	no	no	no	no	no	no	yes	no	no	no	no	no	yes	no	no	no	no	no	no	no	no	no	no	no
955	2013-04-25	11:25:00	Marko	Marine	M.murinus	M	2011-11-04	1.47397	36	12:00:00	11	11	<2sec	<2sec	no	no	no	no	no	no	no	no	no	no	yes	no	no	no	no	no	yes	no	no	no	no	no	no	no	no	no	no	no
